# Supplementary material for: Hydrogen spillover effect – harnessing hydrogen evolution reaction from diverse carbon-based supports with a tungsten oxide catalyst
Source: Royal Society of Chemistry journal article supplement (doi:10.1039/d3ta02509h), 2023-01-01
Supplement: d3ta02509h1.pdf [file d3ta02509h1.pdf]

## Supporting Information

1

2

### 3 **Hydrogen spillover effect - Harnessing Hydrogen Evolution Reaction** 4 **from Diverse Carbon-based Supports with Tungsten Oxide Catalyst**

5

6 R Rajalakshmi, G Srividhya, C Viswanathan, N Ponpandian\*

7 Department of Nanoscience and Technology, Bharathiar University, Coimbatore, India.

8

9

#### 10 **Table of contents:**

11

12 - Supplementary Figures S1- S27

13 - Supplementary Table S1-S5

14 - References

15 - Supplementary Calculation

16

17

18

19

20

21

22

23

24

25

26

27

28

29

## Supplementary figures

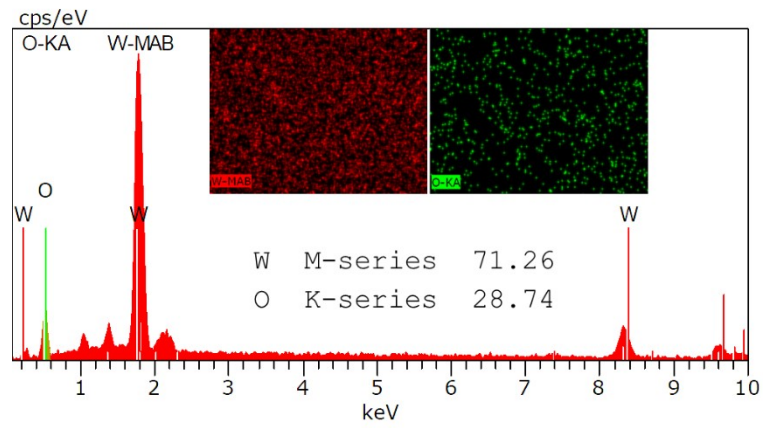

30

31

**Figure S1.** EDAX and elemental mapping of  $\text{WO}_3$  nanorods.

32

33

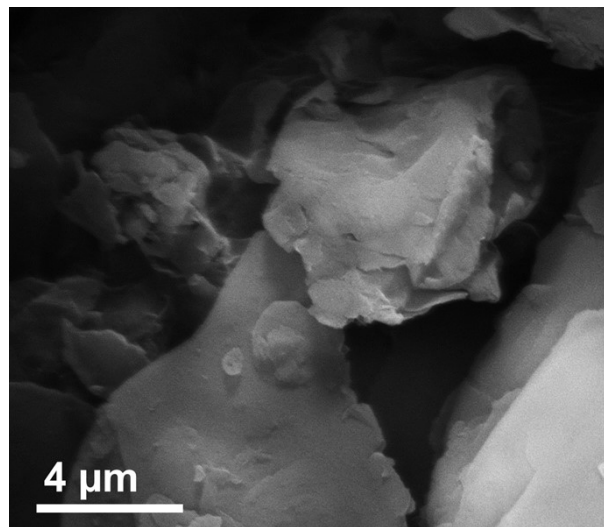

34

35

**Figure S2.** FESEM image of pristine graphene oxide (GO)

36

37

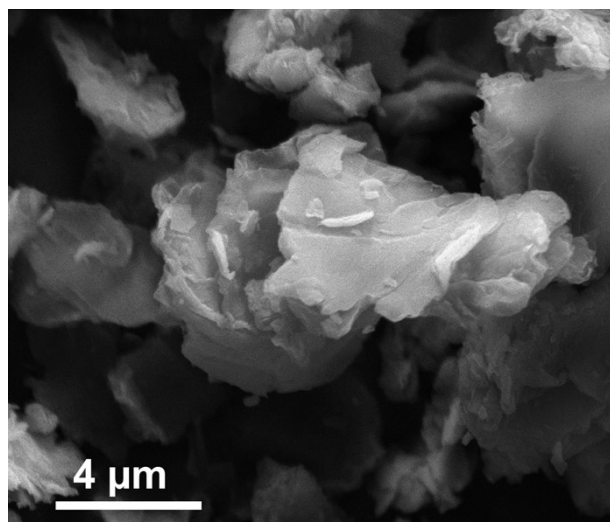

38

39

**Figure S3.** FESEM image of pristine reduced graphene oxide (rGO)

40

41

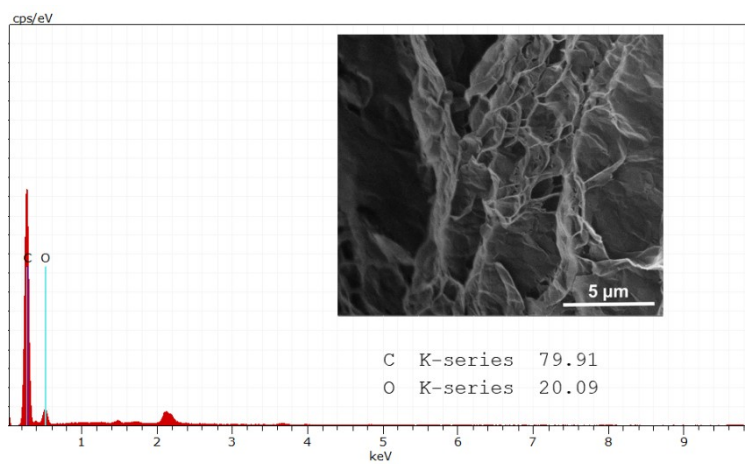

42

**Figure S4.** EDAX representing the carbon and oxygen content of reduced graphene sheets

44

(GR). Inset represents the FESEM image of multilayered reduced graphene sheets.

45

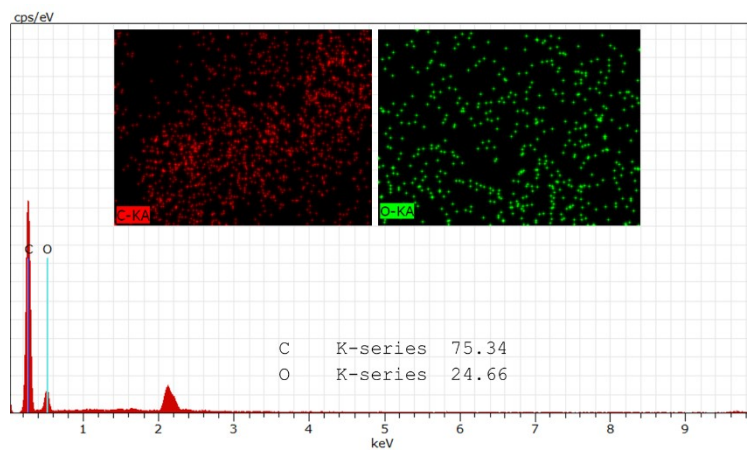

46

47

**Figure S5.** EDAX and elemental mapping of reduced graphene oxide (rGO).

48

49

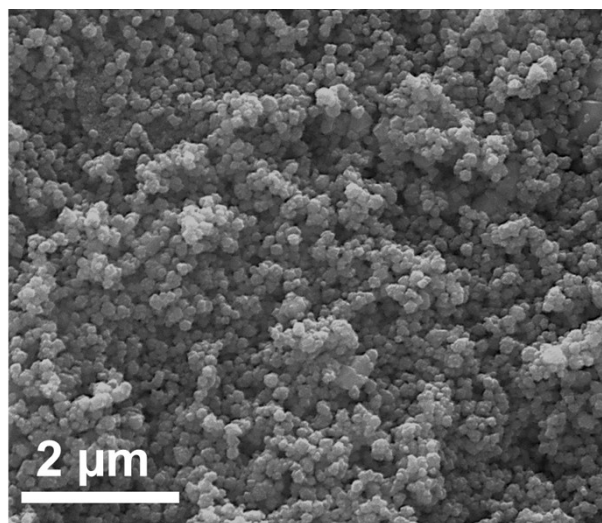

50

51

**Figure S6.** FESEM image of as purchased carbon black sub-micro particles (CB)

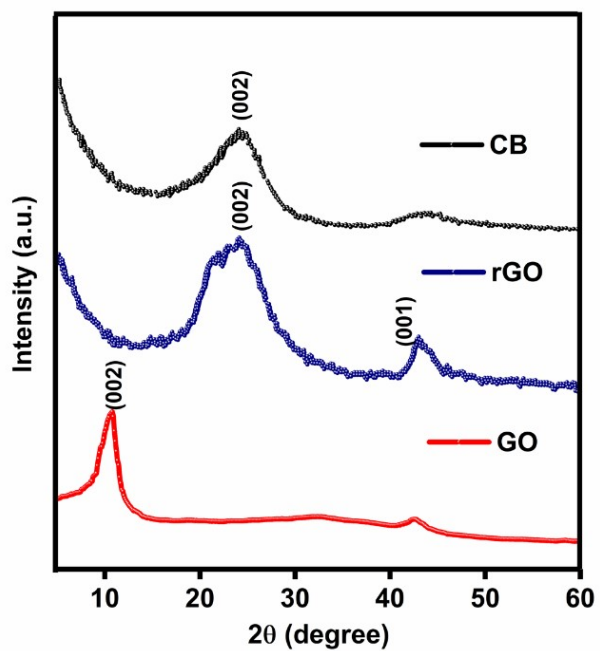

52

53

**Figure S7.** X-Ray diffraction patterns of GO, rGO and CB.

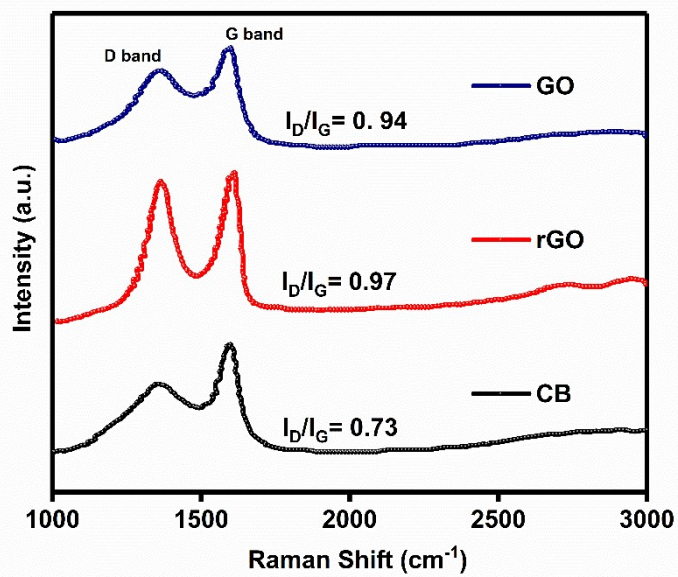

54

55

**Figure S8.** Raman spectra of GO, rGO and CB.

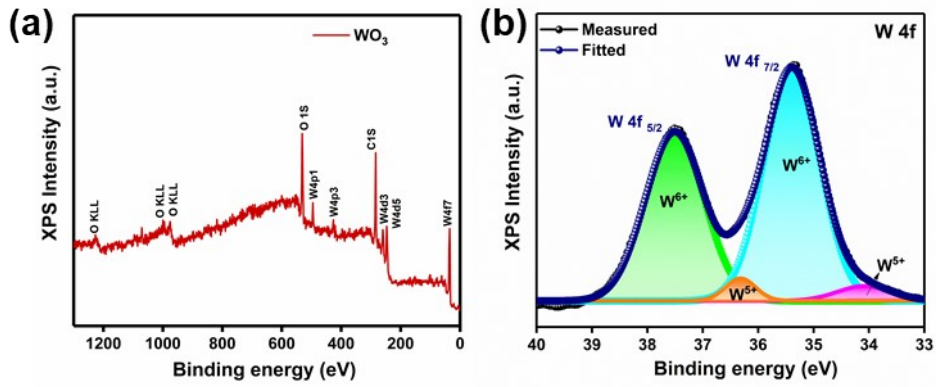

56

57 **Figure S9.** (a) XPS spectra of pristine  $\text{WO}_3$  and (b) the deconvoluted XPS spectra of W 4f.

58

59

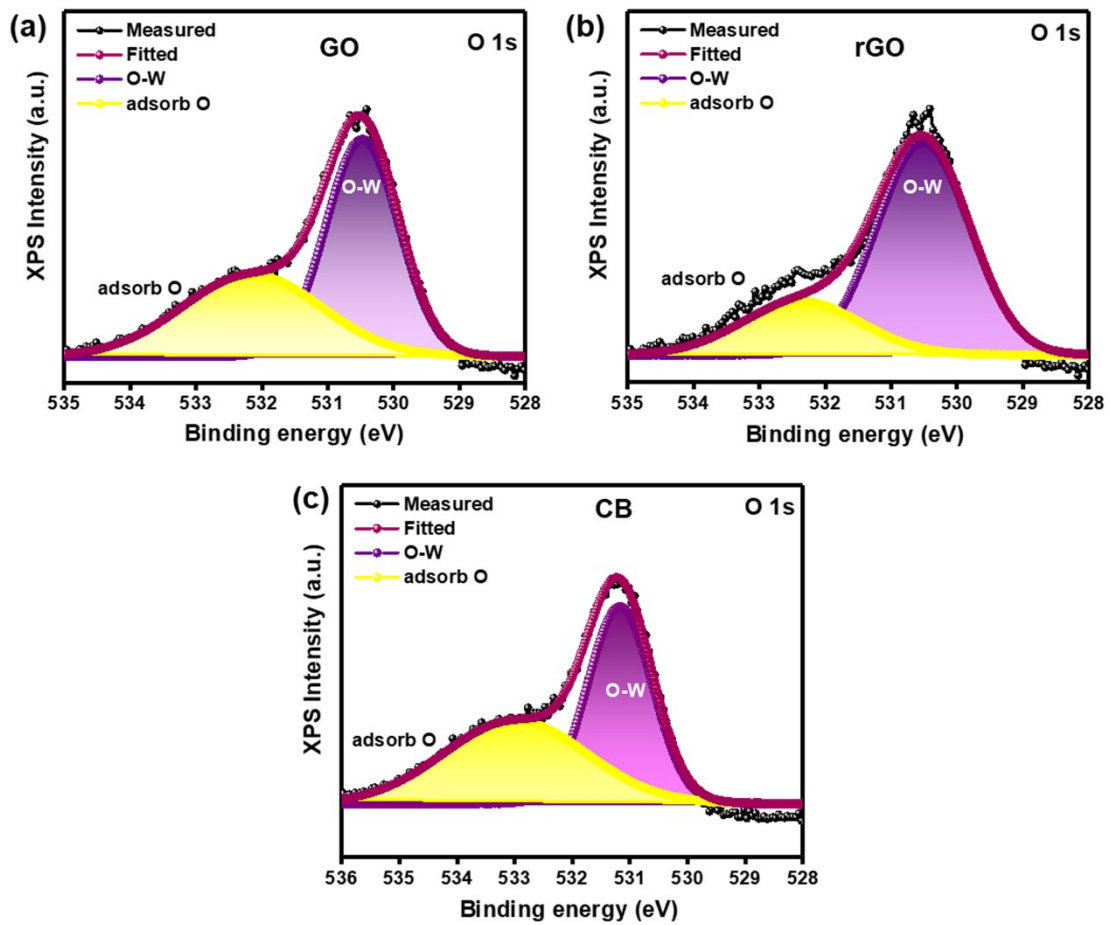

60

61 **Figure S10.** Deconvoluted XPS spectra of O1s of (a)  $\text{WO}_3/\text{GO}$ , (b)  $\text{WO}_3/\text{rGO}$ , and (c)

62

$\text{WO}_3/\text{CB}$ ,

63

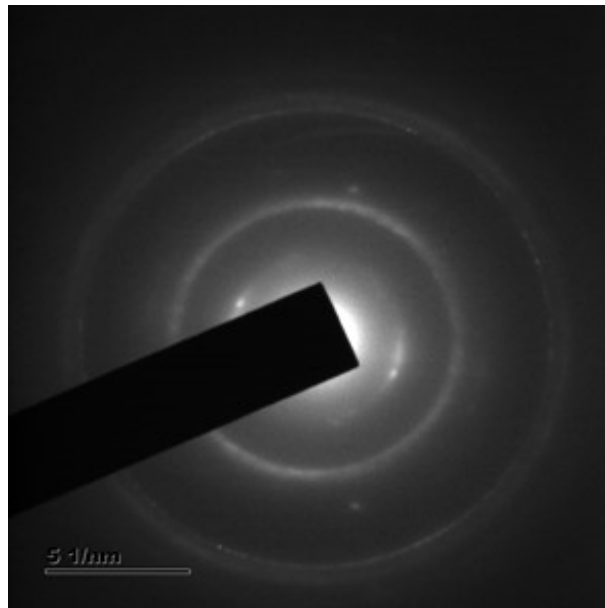

64

65

**Figure S11.** SAED pattern of graphene sheets.

66

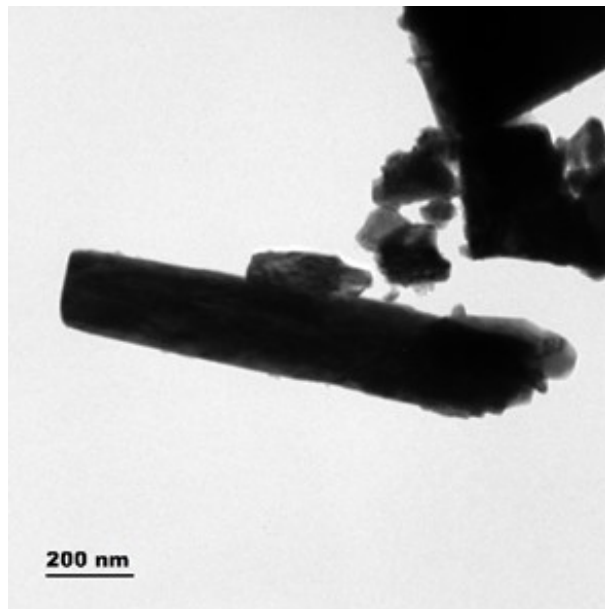

67

68

**Figure S12.** TEM image of WO<sub>3</sub> nanorods.

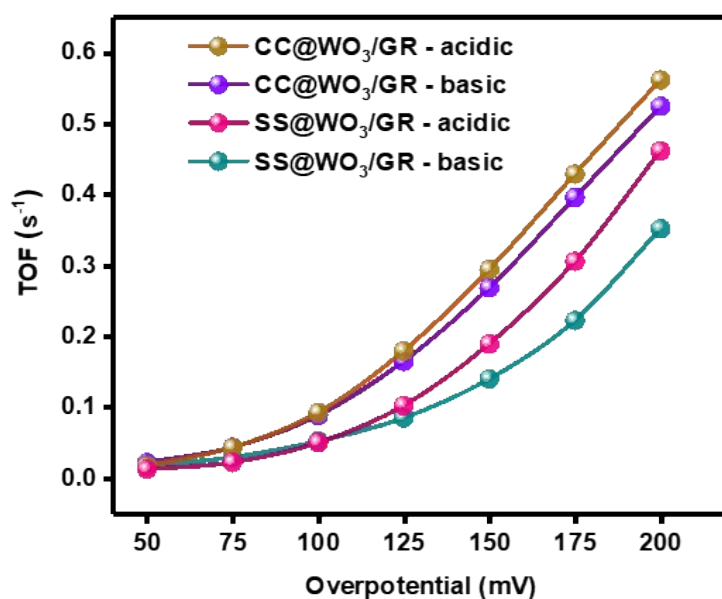

69

70 **Figure S13** - The turnover frequency (TOF) of CC@WO<sub>3</sub>/GR and SS@WO<sub>3</sub>/GR in both the  
 71 acidic and basic electrolytes at different overpotential values related to the H<sub>2</sub> gas production.

72

73

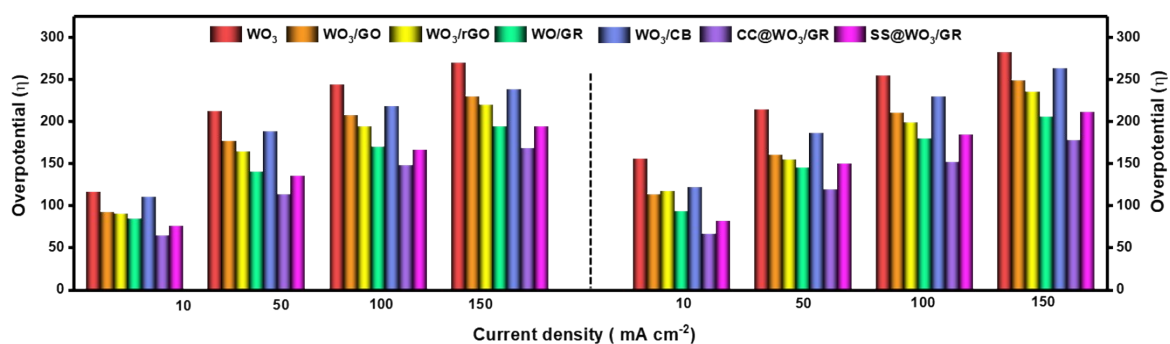

74

75 **Figure S14.** Comparison of overpotential values of all the electrocatalysts of WO<sub>3</sub> at  
 76 different intervals of current density.

77



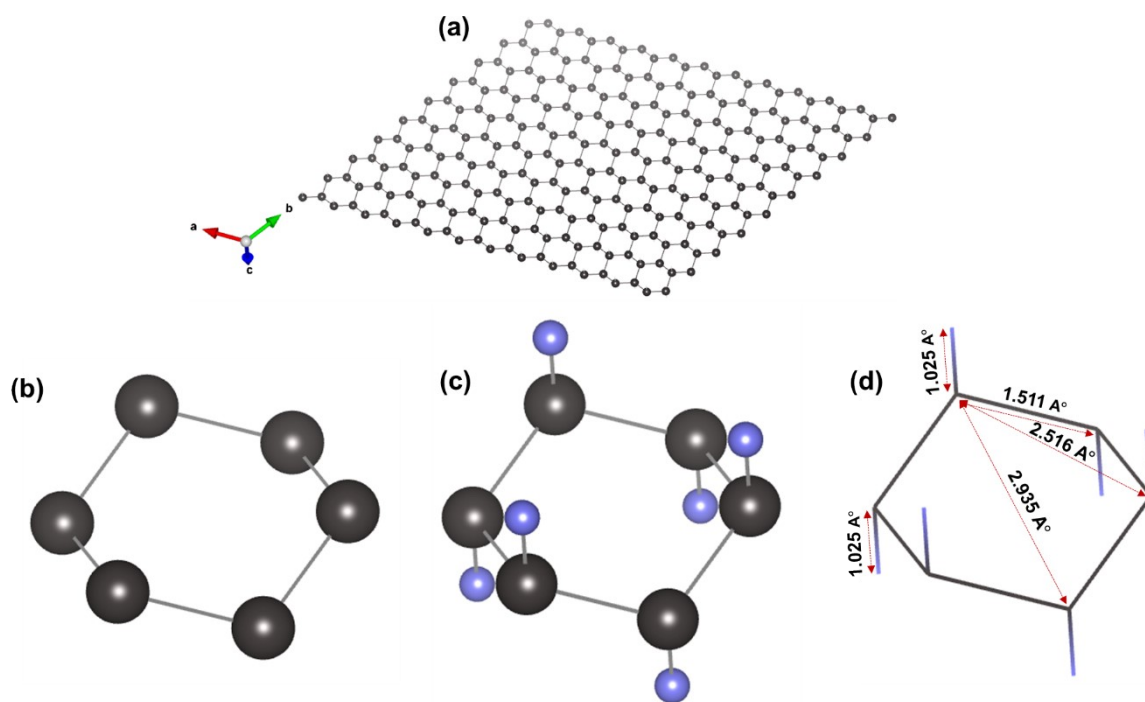

78

79 **Figure S15.** (a) Graphene sheet, (b) single graphene in Ball and stick model, (c) graphene in

80 ball and stick model and (d) the bond angles representing in the wireframe model.

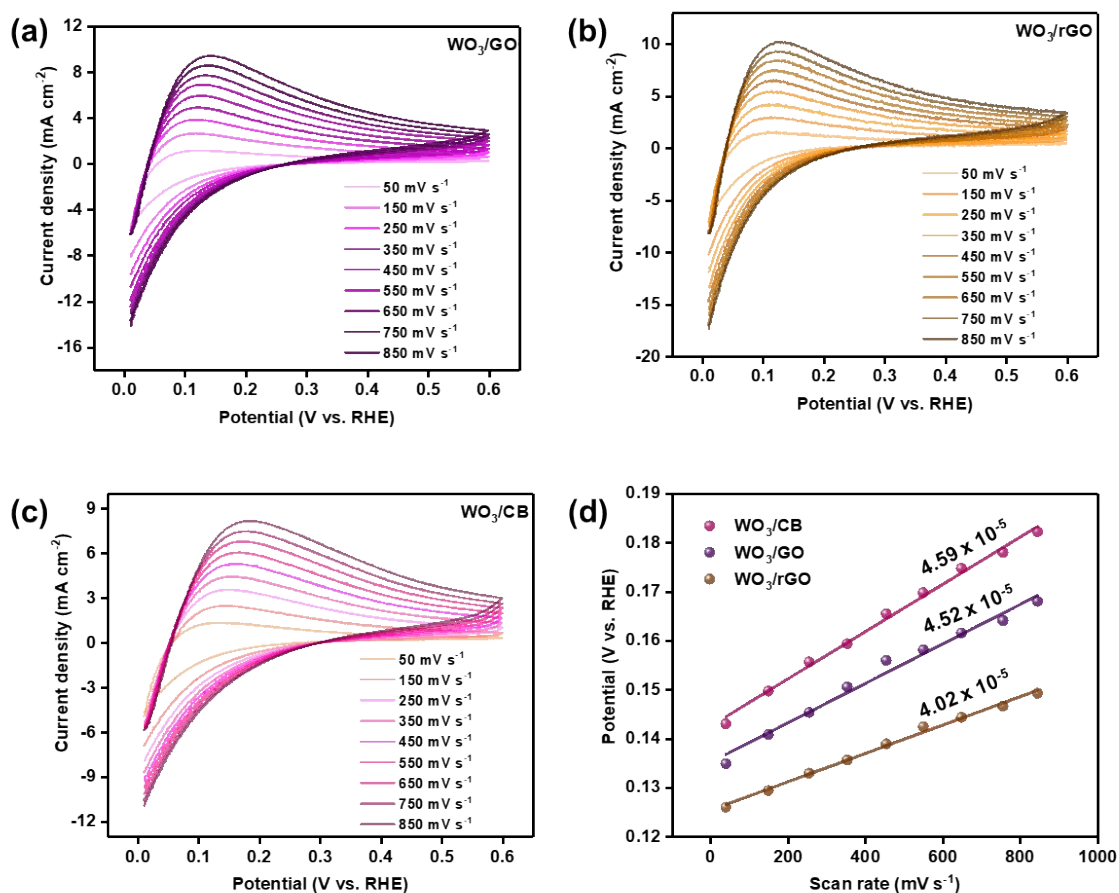

81

82 **Figure S16.** Cyclic voltammetry curves of (a) WO<sub>3</sub>/GO, (b) WO<sub>3</sub>/rGO, and (c) WO<sub>3</sub>/CB  
 83 electrocatalyst at different scan rates indicating the hydrogen desorption peaks. (d) The slope  
 84 values of the desorption peak at different potential values vs the scan rate values to determine  
 85 the slope values of all three carbon-based electrocatalysts.

86

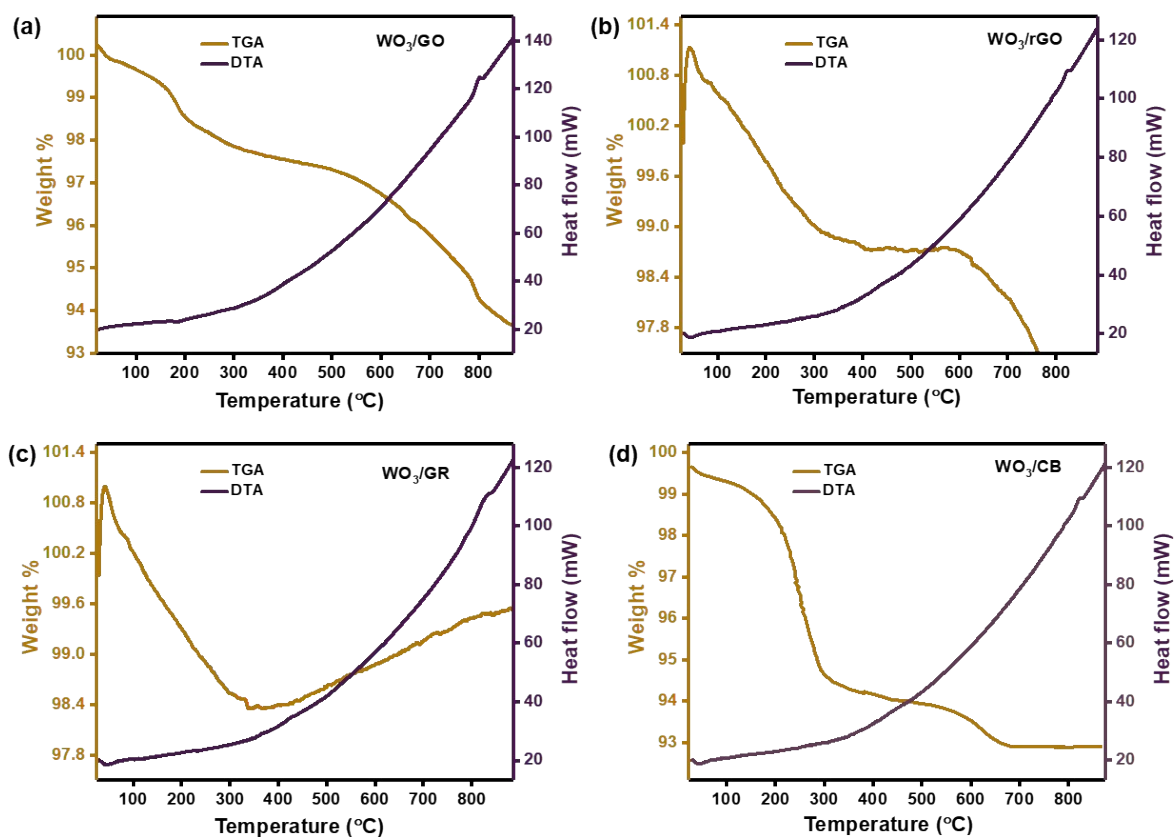

87

88 **Figure S17.** TGA and DTA curves of (a)  $\text{WO}_3/\text{GO}$ , (b)  $\text{WO}_3\text{-rGO}$ , (c)  $\text{WO}_3/\text{GR}$ , and (d)  
 89  $\text{WO}_3/\text{CB}$  electrocatalysts respectively.

90

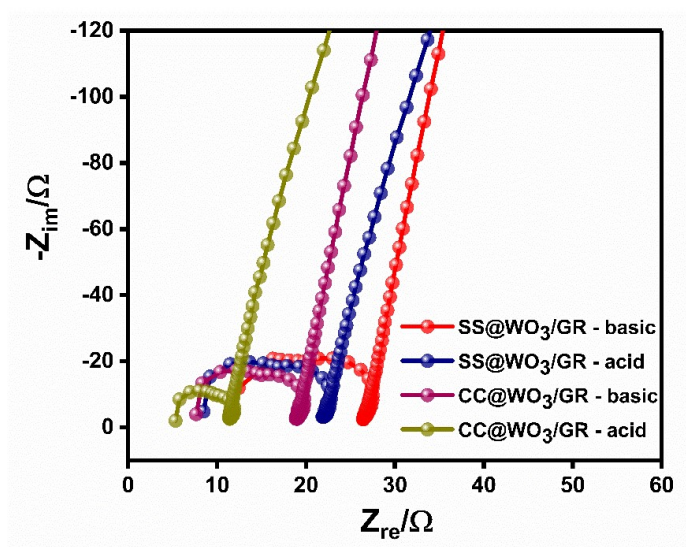

91

92 **Figure S18.** Enlarged area of Fig. 5a representing the solution resistance and the faradaic  
 93 impedance.

94

95

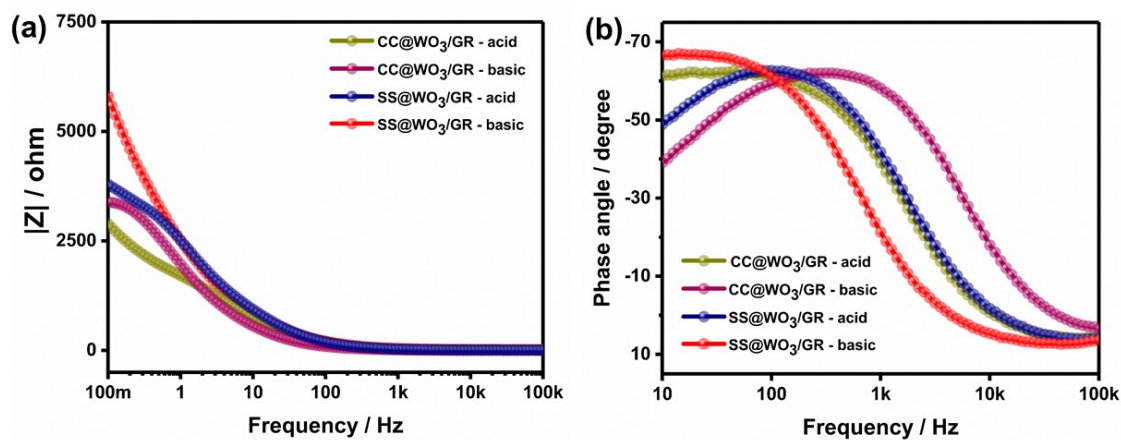

96

97 **Figure S19.** (a) The phase angle and (b) cut off frequency measurements of the WO<sub>3</sub>/GR  
98 electrocatalyst deposited on CC and SS substrates in both the electrolytic mediums.

99

100

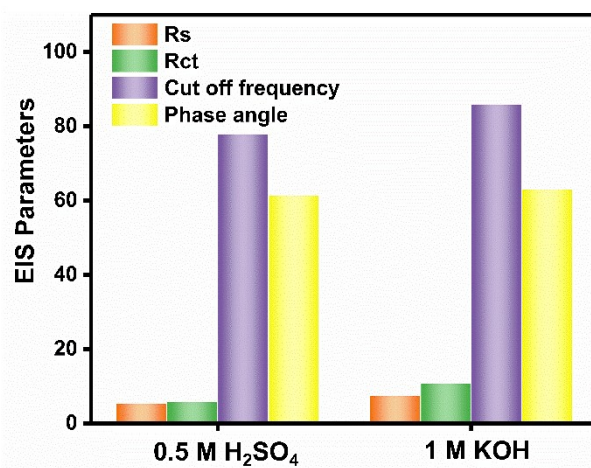

101

102 **Figure S20.** Comparison of the solution resistance, charge transfer resistance, cut of frequency  
103 and phase angle of CC@WO<sub>3</sub>/GR electrocatalyst in acidic and basic electrolytes.

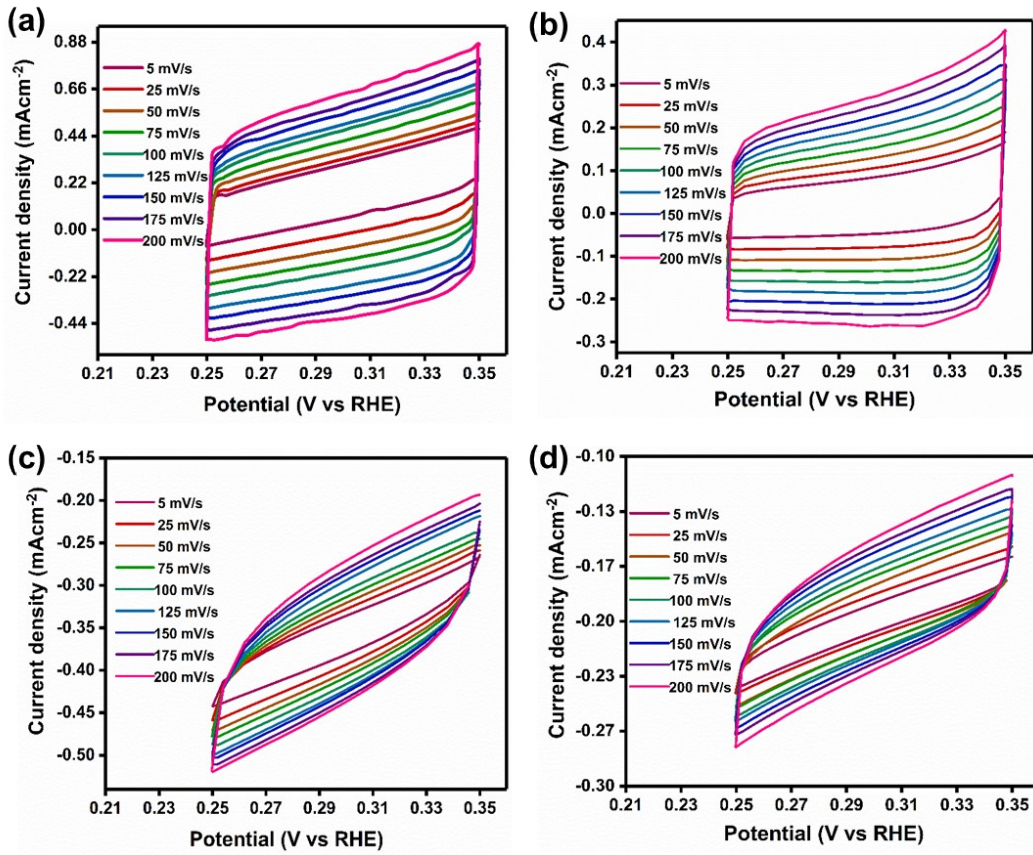

104

105 **Figure S21.** Cyclic voltammograms of (a) CC@WO<sub>3</sub>/GR - 0.5 M H<sub>2</sub>SO<sub>4</sub>, (b) CC@WO<sub>3</sub>/GR - 1M  
 106 KOH, (c) SS@WO<sub>3</sub>/GR - 0.5 M H<sub>2</sub>SO<sub>4</sub>, (d) SS@WO<sub>3</sub>/GR - 1M KOH swept in the non-faradaic  
 107 region at different intervals of scan rate from 5- 200 mV/s.

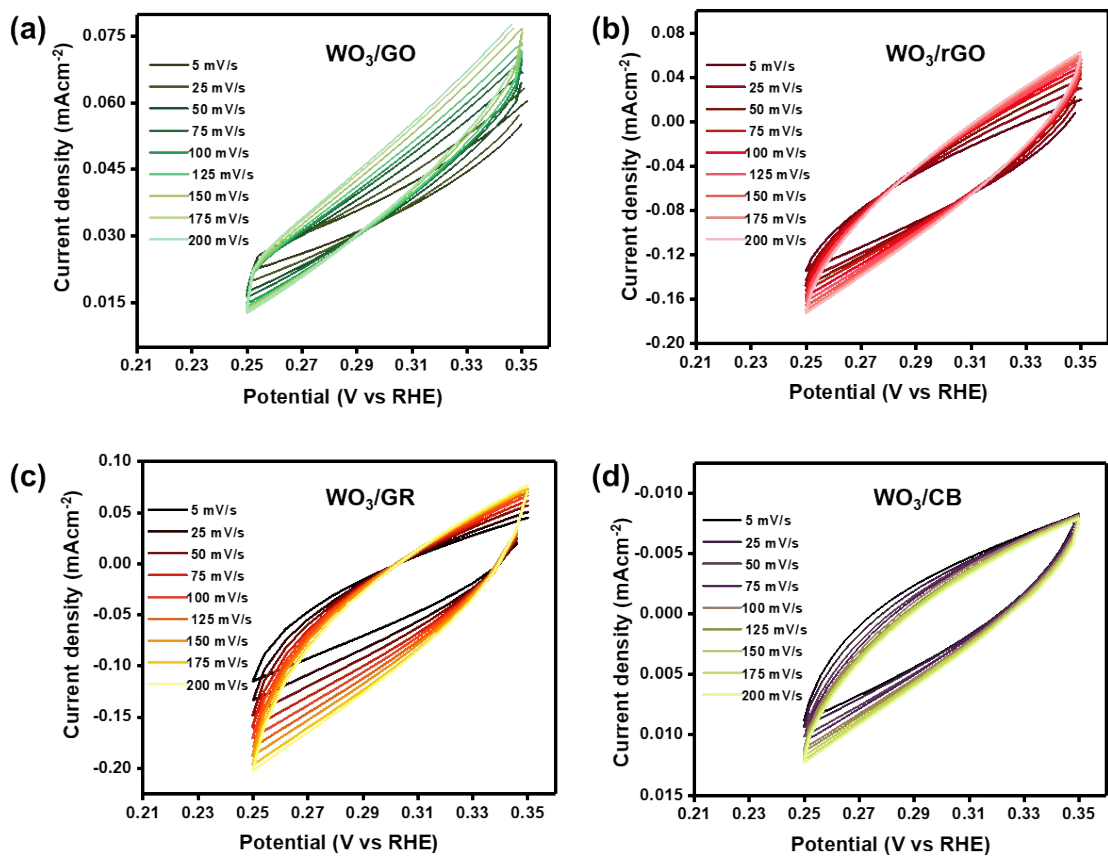

108

109 **Figure S22.** Cyclic voltammograms of (a)  $\text{WO}_3/\text{GO}$ , (b)  $\text{WO}_3/\text{rGO}$ , (c)  $\text{WO}_3/\text{GR}$ , and (d)  $\text{WO}_3/\text{CB}$   
 110 in 0.5 M  $\text{H}_2\text{SO}_4$  swept in the non-faradaic region at different intervals of scan rate from 5- 200  
 111 mV/s.

112

113



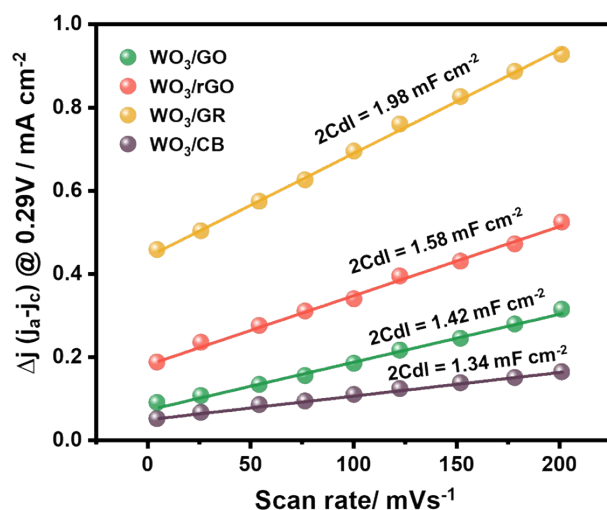

114

115 **Figure S23.** The capacitance obtained from the fit of double-layer charging current density  
 116 versus scan rate for  $\text{WO}_3/\text{GO}$ ,  $\text{WO}_3/\text{rGO}$ ,  $\text{WO}_3/\text{GR}$ , and  $\text{WO}_3/\text{CB}$  electrocatalysts in acidic 0.5  
 117 M  $\text{H}_2\text{SO}_4$  electrolyte

118

119

120

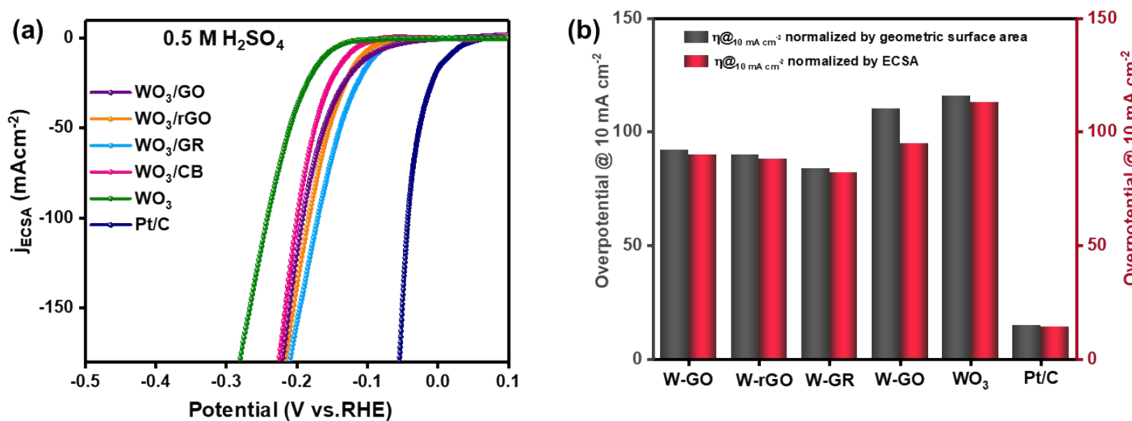

121

122 **Figure S24.** (a) LSV normalized curves of the electrocatalysts  $\text{WO}_3/\text{GO}$ ,  $\text{WO}_3/\text{rGO}$ ,  $\text{WO}_3/\text{GR}$ ,  
 123 and  $\text{WO}_3/\text{CB}$  with respect to electrochemical active surface area and (b) the comparison of the  
 124 overpotential values at  $10 \text{ mA cm}^{-2}$  with respect to geometric surface area and the  
 125 electrochemical active surface area.

126

127

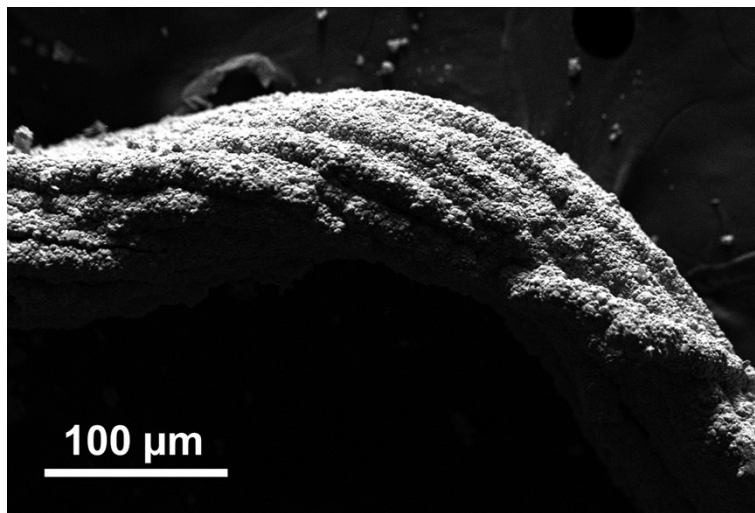

128

129 **Figure S25.** A portion of CC@WO<sub>3</sub>/GR electrocatalyst after the HER long term stability test.

130

131

132

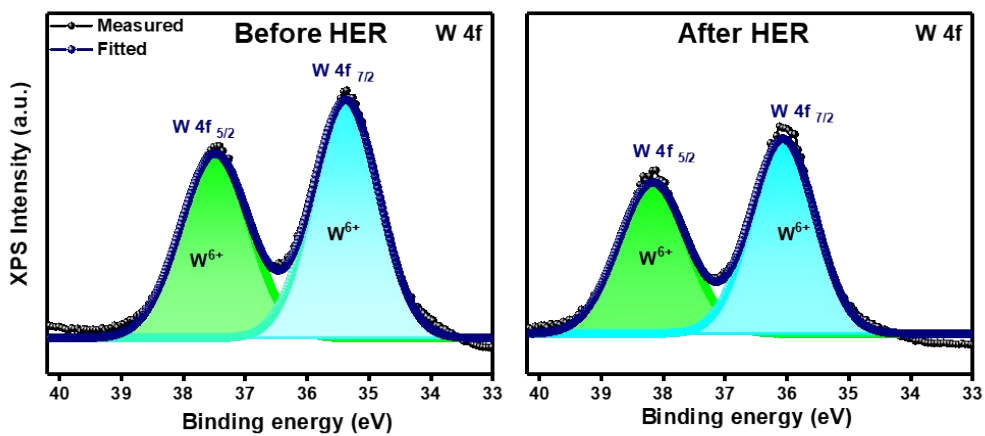

133

134 **Figure S26.** Deconvoluted spectra of W4f before and after the HER long term stability test.

135

136



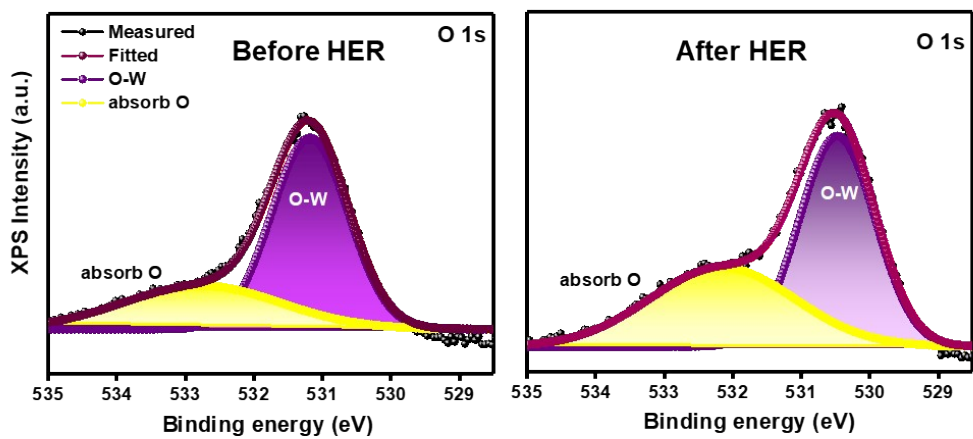

137

138 **Figure S27.** Deconvoluted spectra of O1s before and after the HER long term stability test.

139

140

141

142

143

144

145

146

147

148

149

## Supplementary Table

151 **Table S1:** The overpotential at  $\eta = 10 \text{ mA cm}^{-2}$  and Tafel slope values of all the studied

152 electrocatalysts of  $\text{WO}_3$  in both acidic and basic electrolytic mediums.

| S. No | Electrocatalyst                    | Overpotential at $\eta = 10 \text{ mA cm}^{-2}$ |         | Tafel slope                  |         |
|-------|------------------------------------|-------------------------------------------------|---------|------------------------------|---------|
|       |                                    | 0.5 M $\text{H}_2\text{SO}_4$                   | 1 M KOH | 0.5M $\text{H}_2\text{SO}_4$ | 1 M KOH |
| 1.    | $\text{WO}_3$                      | 116                                             | 155     | 98                           | 107     |
| 2.    | $\text{WO}_3/\text{GO}$            | 92                                              | 113     | 74                           | 83      |
| 3.    | $\text{WO}_3/\text{rGO}$           | 90                                              | 117     | 70                           | 78      |
| 4.    | $\text{WO}_3/\text{GR}$            | 84                                              | 93      | 66                           | 72      |
| 5.    | $\text{WO}_3/\text{CB}$            | 110                                             | 122     | 86                           | 89      |
| 6.    | $\text{CC}@ \text{WO}_3/\text{GR}$ | 64                                              | 78      | 54                           | 58      |
| 7.    | $\text{SS}@ \text{WO}_3/\text{GR}$ | 76                                              | 83      | 62                           | 69      |
| 8.    | Pt/C                               | 15                                              | 17      | 29                           | 32      |

153

154

155 **Table S2:** Mechanism of Hydrogen evolution reaction in acidic and alkaline electrolytes

|                                                                          | Acid                                                                  | Alkaline                                                                                    | Tafel slope                                                  |
|--------------------------------------------------------------------------|-----------------------------------------------------------------------|---------------------------------------------------------------------------------------------|--------------------------------------------------------------|
| <b>Overall</b>                                                           | $* + 2\text{H}^+ + 2\text{e}^- \rightarrow \text{H}_2$                | $* + 2\text{H}_2\text{O} + 2\text{e}^- \rightarrow \text{H}_2 + 2\text{OH}^-$               | $\eta = a + b \log(-j)$                                      |
| <b>Volmer</b>                                                            | $* + \text{H}^+ + \text{e}^- \rightarrow \text{H}^*$                  | $* + \text{H}_2\text{O} + \text{e}^- \rightarrow \text{H}^* + \text{OH}^-$                  | $b = 2.3\text{RT}/\alpha\text{F} \sim 120 \text{ mV/dec}$    |
| <b>Heyrovsky</b>                                                         | $* + \text{H}^+ + \text{e}^- + \text{H}^* \rightarrow \text{H}_2 + *$ | $* + \text{H}_2\text{O} + \text{e}^- + \text{H}^* \rightarrow \text{H}_2 + \text{OH}^- + *$ | $b = 2.3\text{RT}/(1+\alpha)\text{F} \sim 40 \text{ mV/dec}$ |
| <b>Tafel</b>                                                             | $2\text{H}^* \rightarrow \text{H}_2 + 2*$                             | $2\text{H}^* \rightarrow \text{H}_2 + 2*$                                                   | $b = 2.3\text{RT}/2\text{F} \sim 30 \text{ mV/dec}$          |
| Where “*” denotes the active site on the surface of the electrocatalyst. |                                                                       |                                                                                             |                                                              |

156

157 **Table S3:** The Nernst equation and coupling processes necessary to produce the three  
 158 dimensional Tungsten Pourbaix diagram at T = 298 K.

| No | Species                                                                               | Reaction                                                                                                                   | Nernst equation                                                                                            |
|----|---------------------------------------------------------------------------------------|----------------------------------------------------------------------------------------------------------------------------|------------------------------------------------------------------------------------------------------------|
| 1. | WO <sub>2</sub> (s)/W(s)                                                              | WO <sub>2</sub> + 4H <sup>+</sup> + 4e <sup>-</sup> = W + 2H <sub>2</sub> O                                                | E <sub>c</sub> = -0.15 - 0.059pH                                                                           |
| 2. | WO <sub>3</sub> (s)/WO <sub>2</sub> (s)                                               | WO <sub>3</sub> + 2H <sup>+</sup> + 2e <sup>-</sup> = WO <sub>2</sub> + H <sub>2</sub> O                                   | E <sub>c</sub> = 0.038 - 0.059pH                                                                           |
| 3. | WO <sub>3</sub> (s)/ HW <sub>6</sub> O <sub>21</sub> <sup>5-</sup> (aq)               | 6WO <sub>3</sub> + 3H <sub>2</sub> O = HW <sub>6</sub> O <sub>21</sub> <sup>5-</sup> + 5H <sup>+</sup>                     | 5pH = log [HW <sub>6</sub> O <sub>21</sub> <sup>5-</sup> ] + 20.92                                         |
| 4. | HW <sub>6</sub> O <sub>21</sub> <sup>5-</sup> (aq)/WO <sub>4</sub> <sup>2-</sup> (aq) | HW <sub>6</sub> O <sub>21</sub> <sup>5-</sup> + 3H <sub>2</sub> O = 6WO <sub>4</sub> <sup>2-</sup> + 7H <sup>+</sup>       | 7pH = 6log [WO <sub>4</sub> <sup>2-</sup> ] - log [HW <sub>6</sub> O <sub>21</sub> <sup>5-</sup> ] + 67.82 |
| 5. | WO <sub>3</sub> (s)/ WO <sub>4</sub> <sup>2-</sup> (aq)                               | WO <sub>3</sub> + H <sub>2</sub> O = WO <sub>4</sub> <sup>2-</sup> + 2H <sup>+</sup>                                       | 2pH = log[WO <sub>4</sub> <sup>2-</sup> ] + 14.79                                                          |
| 6. | WO <sub>4</sub> <sup>2-</sup> (aq)/ W(s)                                              | WO <sub>4</sub> <sup>2-</sup> + 8H <sup>+</sup> + 6e <sup>-</sup> = W + 4H <sub>2</sub> O                                  | E <sub>c</sub> = 0.06 + 0.01log[WO <sub>4</sub> <sup>2-</sup> ] - 0.079pH                                  |
| 7. | WO <sub>4</sub> <sup>2-</sup> (aq)/ WO <sub>2</sub> (s)                               | WO <sub>4</sub> <sup>2-</sup> + 4H <sup>+</sup> + 2e <sup>-</sup> = WO <sub>2</sub> + 2H <sub>2</sub> O                    | E <sub>c</sub> = 0.48 + 0.03log[WO <sub>4</sub> <sup>2-</sup> ] - 0.118 pH                                 |
| 8. | HW <sub>6</sub> O <sub>21</sub> <sup>5-</sup> (aq)/ WO <sub>2</sub> (s)               | HW <sub>6</sub> O <sub>21</sub> <sup>5-</sup> + 17H <sup>+</sup> + 12e <sup>-</sup> = 6WO <sub>2</sub> + 9H <sub>2</sub> O | E <sub>c</sub> = 0.14 + 0.005log[HW <sub>6</sub> O <sub>21</sub> <sup>5-</sup> ] - 0.084 pH                |

159

160

161 **Table S4:** The stable and unstable compounds when the elements W and C react to produce  
 162 the Pourbaix (E-pH) plot.

| Elements studied                                                                                       | Stable compounds                                              | Unstable compounds                                                            |
|--------------------------------------------------------------------------------------------------------|---------------------------------------------------------------|-------------------------------------------------------------------------------|
| W (Tungsten) – 80%<br>C ( Carbon) – 20%<br>Concentration: 10 <sup>0</sup> mol/kg<br>Temperature: 298 K | WO <sub>3</sub> (s) + CH <sub>4</sub> (aq)                    | WO <sub>4</sub> <sup>2-</sup> + CO <sub>2</sub> (aq)                          |
|                                                                                                        | CH <sub>4</sub> (aq) + W <sub>18</sub> O <sub>49</sub> (s)    | W(s) + CH <sub>3</sub> CH <sub>2</sub> OH (aq)                                |
|                                                                                                        | CH <sub>4</sub> (aq) + W(s)                                   | W(s) + CH <sub>3</sub> COOH (aq)                                              |
|                                                                                                        | W <sub>8</sub> O <sub>21</sub> (s) + CH <sub>4</sub> (aq)     | WO <sub>3</sub> (s) + CO <sub>2</sub> (aq)                                    |
|                                                                                                        | WO <sub>3</sub> (s) + CO <sub>2</sub> (s)                     | WO <sub>3</sub> (s) + CO <sub>3</sub> <sup>2-</sup>                           |
|                                                                                                        | WO <sub>4</sub> <sup>2-</sup> + CO <sub>3</sub> <sup>2-</sup> | CO <sub>2</sub> (s) + W <sub>18</sub> O <sub>49</sub> (s)                     |
|                                                                                                        | CH <sub>4</sub> (aq) + WO <sub>4</sub> <sup>2-</sup>          | W <sub>18</sub> O <sub>49</sub> (s) + CH <sub>3</sub> CH <sub>2</sub> OH (aq) |
|                                                                                                        | HCO <sub>3</sub> <sup>-</sup> + WO <sub>4</sub> <sup>2-</sup> | W <sub>18</sub> O <sub>49</sub> (s) + CH <sub>3</sub> COOH (aq)               |
| WO <sub>4</sub> <sup>2-</sup> + CO <sub>2</sub> (s)                                                    |                                                               |                                                                               |

163

164

165

166

167 **Table S5:** References of the electrocatalysts illustrated in Figure 8d.

| <b>S.No</b> | <b>Electrocatalyst</b>                                   | <b>Reference</b> |
|-------------|----------------------------------------------------------|------------------|
| 1.          | WO <sub>3</sub> /C@CoO                                   | [1]              |
| 2.          | Pt/def-WO <sub>3</sub> @CFC                              | [2]              |
| 3.          | Pt/WO <sub>3</sub>                                       | [2]              |
| 4.          | CC@WO <sub>3</sub> /GR                                   | This work        |
| 5.          | SS@ WO <sub>3</sub> /GR                                  | This work        |
| 6.          | WO <sub>3</sub> /GR                                      | This work        |
| 7.          | Fe-WO <sub>x</sub> P/rGO                                 | [3]              |
| 8.          | WO <sub>3</sub> /rGO                                     | This work        |
| 9.          | WO <sub>3</sub> /GO                                      | This work        |
| 10.         | V-WO <sub>3</sub>                                        | [4]              |
| 11.         | WSe <sub>2</sub> /WO <sub>3-y</sub>                      | [5]              |
| 12.         | WO <sub>3</sub> /CB                                      | This work        |
| 13.         | WO <sub>3</sub> /TiO <sub>2</sub>                        | [6]              |
| 14.         | WO <sub>3-x</sub> -CNFs                                  | [7]              |
| 15.         | CC@WO <sub>3</sub> – Sm 4%                               | [8]              |
| 16.         | WS <sub>2</sub> /WC-WO <sub>3</sub>                      | [9]              |
| 17.         | Mn-WO <sub>3</sub>                                       | [4]              |
| 18.         | WO <sub>3</sub> /MoS <sub>2</sub> -MoOx                  | [10]             |
| 19.         | CoSe <sub>2</sub> /WSe <sub>2</sub> /WO <sub>3</sub> @CC | [11]             |
| 20.         | WO <sub>3</sub> .2H <sub>2</sub> O/WS <sub>2</sub>       | [12]             |
| 21.         | WO <sub>3</sub> -Sm 4%                                   | [8]              |
| 22.         | WS <sub>2</sub> -WO <sub>3</sub> -CNF                    | [13]             |
| 23.         | Pd@WO <sub>3</sub>                                       | [14]             |
| 24.         | CoSe <sub>2</sub> -WO <sub>3</sub>                       | [11]             |
| 25.         | MoS <sub>2</sub> @WO <sub>3</sub>                        | [10]             |
| 26.         | WO <sub>3</sub> /NPRGO                                   | [15]             |
| 27.         | Meso-WO <sub>2.83</sub>                                  | [16]             |
| 28.         | WS <sub>2</sub> -WO <sub>3</sub>                         | [17]             |
| 29.         | Ta-WO <sub>3</sub>                                       | [18]             |
| 30.         | Zeolite/WO <sub>3</sub>                                  | [19]             |

## Supplementary Calculation

170 The turnover frequency is calculated using the relation

$$\text{TOF} = j / (m \times F \times n) \text{ (s}^{-1}\text{)}$$

171 Here,  $j$  is the current density at a particular overpotential value ( $\eta$  in mV),  $m$  is the number of  
 172 moles present in the catalyst,  $F$  is the Faraday constant ( $96,485.4 \text{ C mol}^{-1}$ ), and  $n$  is the number  
 173 of electrons transferred to generate one molecule of hydrogen gas which is 2 [20].

174 To calculate the number of moles present in the active electrocatalyst -  $\text{WO}_3/\text{GR}$ , the individual  
 175 number of moles of  $\text{WO}_3$  and reduced graphene layers (GR) were taken into consideration.

176 Moles of  $\text{WO}_3 = \text{weight of } \text{WO}_3 / \text{molecular weight of } \text{WO}_3$

177 The molecular weight of  $\text{WO}_3$  is  $(183.84 \text{ g/mol}) + 3 * (16.00 \text{ g/mol}) = 231.84 \text{ g/mol}$ .

178 Weight of  $\text{WO}_3 = 80 \text{ mg} = 0.080 \text{ g}$  (The ratio of  $\text{WO}_3:\text{GR}$  in the composite is  $80 \text{ mg} : 20 \text{ mg}$ )

179 Therefore, moles of  $\text{WO}_3 = 0.080\text{g} / 231.84 \text{ g/mol} = 0.000345066 \text{ moles}$

180 The accurate number of moles of GR could not be determined without knowing the exact  
 181 molecular weight of GR which is dependent on numerous factors such as the extent of reduction  
 182 of graphene oxide (GO), the presence of residual functional groups, and the exact number of  
 183 layers of graphene. Hence an approximate estimation is deducted from the elemental analysis  
 184 derived from EDAX measurements in FESEM from Supplementary Figure S4.

185 Molecular weight from atomic weight percentage of elements in GR

$$= [ (\text{C wt. \%} / 100) * 12.01 \text{ g/mol} ] + [ (\text{O wt. \%} / 100) * 16.00 \text{ g/mol} ]$$

187 The approximate molecular weight of GR =  $12.8115 \text{ g/mol}$

188 Moles of GR =  $0.020\text{g} / 12.8115 \text{ g/mol} = 0.001561097 \text{ moles}$

189 Total number of moles in the  $\text{WO}_3/\text{GR}$  electrocatalyst is  $1.906163 \times 10^{-3} \text{ moles}$

190 At an overpotential of  $50 \text{ mV}$ , the respective current density,  $j$  for the  $\text{CC}@ \text{WO}_3/\text{GR}$  electrode  
 191 in the  $0.5\text{M } \text{H}_2\text{SO}_4$  electrolyte is  $7.66 \text{ mA cm}^{-2}$  (From Figure 4b).

192 Therefore  $TOF = 7.66 \times 10^{-3} / (1.906163 \times 10^{-3} \times 96485.4 \times 2) = 0.00208 \times 10^{-2} \text{ s}^{-1}$

193 Similarly, the TOF values were calculated at 75, 100, 125, 150,175, and 200 mV [21] for the  
194 electrodes CC@WO<sub>3</sub>/GR and SS@WO<sub>3</sub>/GR in both the acidic and basic electrolytes and  
195 represented in Figure S13 respectively.

196

197

198

199

200

201

202

203

204

205

206

207

208

209

210

211

212

## 213 References

- 214 1 Y. Lv, Y. Liu, C. Chen, T. Wang and M. Zhang, *Electrochim Acta*, 2018, **281**, 1–8.
- 215 2 H. Tian, X. Cui, L. Zeng, L. Su, Y. Song and J. Shi, *J Mater Chem A Mater*, 2019, **7**,  
216 6285–6293.
- 217 3 T. H. Wondimu, G.-C. Chen, D. M. Kabtamu, H.-Y. Chen, A. W. Bayeh, H.-C. Huang  
218 and C. H. Wang, *Int J Hydrogen Energy*, 2018, **43**, 6481–6490.
- 219 4 S. Chandrasekaran, P. Zhang, F. Peng, C. Bowen, J. Huo and L. Deng, *J Mater Chem A*  
220 *Mater*, 2019, **7**, 6161–6172.
- 221 5 V. Yu. Fominski, S. N. Grigoriev, R. I. Romanov, M. A. Volosova, A. I. Grunin and G.  
222 D. Teterina, *Technical Physics Letters*, 2016, **42**, 555–558.
- 223 6 S. Y. Toledo Camacho, A. Rey, M. D. Hernández-Alonso, J. Llorca, F. Medina and S.  
224 Contreras, *Appl Surf Sci*, 2018, **455**, 570–580.
- 225 7 J. Chen, D. Yu, W. Liao, M. Zheng, L. Xiao, H. Zhu, M. Zhang, M. Du and J. Yao, *ACS*  
226 *Appl Mater Interfaces*, 2016, **8**, 18132–18139.
- 227 8 R. Rajalakshmi, C. Viswanathan and N. Ponpandian, *Sustain Energy Fuels*, 2021, **5**,  
228 5851–5865.
- 229 9 Y. Chen, R. Ren, Z. Wen, S. Ci, J. Chang, S. Mao and J. Chen, *Nano Energy*, 2018, **47**,  
230 66–73.
- 231 10 M. Tayebi, Z. Masoumi, M. Kolaei, A. Tayyebi, M. Tayebi, B. Seo, C.-S. Lim, H.-G.  
232 Kim and B.-K. Lee, *Chemical Engineering Journal*, 2022, **446**, 136830.
- 233 11 Y. Lv, Y. Liu, Y. Liu, Z. Chen and M. Zhang, *J Alloys Compd*, 2018, **768**, 889–895.
- 234 12 L. Yang, X. Zhu, S. Xiong, X. Wu, Y. Shan and P. K. Chu, *ACS Appl Mater Interfaces*,  
235 2016, **8**, 13966–13972.
- 236 13 X. Zhang, P. Yang and S. P. Jiang, *J Nanostructure Chem*, 2021, **11**, 367–380.
- 237 14 R. Choudhary, S. Patra, R. Madhuri and P. K. Sharma, *ACS Sustain Chem Eng*, 2017, **5**,  
238 9735–9748.

- 239 15 G. Hu, J. Li, P. Liu, X. Zhu, X. Li, R. N. Ali and B. Xiang, *Appl Surf Sci*, 2019, **463**,  
240 275–282.
- 241 16 H. Cheng, M. Klapproth, A. Sagaltchik, S. Li and A. Thomas, *J Mater Chem A Mater*,  
242 2018, **6**, 2249–2256.
- 243 17 X. Shang, Y. Rao, S.-S. Lu, B. Dong, L.-M. Zhang, X.-H. Liu, X. Li, Y.-R. Liu, Y.-M.  
244 Chai and C.-G. Liu, *Mater Chem Phys*, 2017, **197**, 123–128.
- 245 18 X. Xie, W. Mu, X. Li, H. Wei, Y. Jian, Q. Yu, R. Zhang, K. Lv, H. Tang and S. Luo,  
246 *Electrochim Acta*, 2014, **134**, 201–208.
- 247 19 S. F. Anis and R. Hashaikeh, *Journal of Nanoparticle Research*, 2018, **20**, 47.
- 248 20 Anantharaj S, Karthik P, Noda S, *Angewandte Chemie International Edition*, 2021,  
249 60(43), 23051-23067.
- 250 21 Roy S, Akbar K, Jeon J, Jerng S, Truong L, Kim K, Yi Y, Chun S, *Journal of Materials*  
251 *Chemistry A*, 2019, 7(36), 20590-20596.
